# Supplementary material for: A Fungal α-Galactosidase from Tricholoma matsutake with Broad Substrate Specificity and Good Hydrolytic Activity on Raffinose Family Oligosaccharides
Source: PubMed Central journal article supplement (PMC6332393; doi:10.3390/molecules200813550), 2015-07-24
Supplement: molecules-20-13550-s001.pdf [file molecules-20-13550-s001.pdf]

## Supplemental Material

**Table S1.** Effects of Mg<sup>2+</sup> ions on activity of *Tricholoma matsutake*  $\alpha$ -galactosidase.

| Concentration (mM) | CK    | OD405 | Average of OD405 | OD405-CK | Realtive Activity (%) |
|--------------------|-------|-------|------------------|----------|-----------------------|
| 10                 | 0.094 | 0.223 | 0.200333         | 0.106333 | 30.6 ± 0.03           |
|                    |       | 0.167 |                  |          |                       |
|                    |       | 0.211 |                  |          |                       |
| 5                  | 0.089 | 0.382 | 0.370333         | 0.281333 | 80.9 ± 0.01           |
|                    |       | 0.355 |                  |          |                       |
|                    |       | 0.374 |                  |          |                       |
| 2.5                | 0.086 | 0.372 | 0.373333         | 0.287333 | 82.6 ± 0.02           |
|                    |       | 0.392 |                  |          |                       |
|                    |       | 0.356 |                  |          |                       |
| 1.25               | 0.084 | 0.448 | 0.407333         | 0.323333 | 93.0 ± 0.04           |
|                    |       | 0.398 |                  |          |                       |
|                    |       | 0.376 |                  |          |                       |

The activity of  $\alpha$ -galactosidase without incubation with metal ions was set as 100%, it was 0.34767.

**Table S2.** Effects of Mn<sup>2+</sup> ions on activity of *Tricholoma matsutake*  $\alpha$ -galactosidase.

| Concentration (mM) | CK    | OD405 | Average of OD405 | OD405-CK | Realtive Activity (%) |
|--------------------|-------|-------|------------------|----------|-----------------------|
| 10                 | 0.084 | 0.230 | 0.234667         | 0.150667 | 43.3 ± 0.03           |
|                    |       | 0.207 |                  |          |                       |
|                    |       | 0.267 |                  |          |                       |
| 5                  | 0.082 | 0.365 | 0.322333         | 0.240333 | 69.1 ± 0.07           |
|                    |       | 0.362 |                  |          |                       |
|                    |       | 0.24  |                  |          |                       |
| 2.5                | 0.082 | 0.412 | 0.435333         | 0.35333  | 101.6 ± 0.02          |
|                    |       | 0.436 |                  |          |                       |
|                    |       | 0.458 |                  |          |                       |
| 1.25               | 0.1   | 0.455 | 0.449            | 0.349    | 100.4 ± 0.02          |
|                    |       | 0.431 |                  |          |                       |
|                    |       | 0.461 |                  |          |                       |

The activity of  $\alpha$ -galactosidase without incubation with metal ions was set as 100%, it was 0.34767.

**Table S3.** Effects of Pb<sup>2+</sup> ions on activity of *Tricholoma matsutake*  $\alpha$ -galactosidase.

| Concentration (mM) | CK    | OD405 | Average of OD405 | OD405-CK | Realtive Activity (%) |
|--------------------|-------|-------|------------------|----------|-----------------------|
| 10                 | 0.1   | 0.152 | 0.13333          | 0.0333   | 9.6 ± 0.02            |
|                    |       | 0.134 |                  |          |                       |
|                    |       | 0.114 |                  |          |                       |
| 5                  | 0.91  | 0.236 | 0.369            | 0.278    | 80.0 ± 0.12           |
|                    |       | 0.411 |                  |          |                       |
|                    |       | 0.460 |                  |          |                       |
| 2.5                | 0.98  | 0.301 | 0.405            | 0.307    | 88.3 ± 0.09           |
|                    |       | 0.441 |                  |          |                       |
|                    |       | 0.473 |                  |          |                       |
| 1.25               | 0.083 | 0.460 | 0.414333         | 0.33133  | 95.3 ± 0.05           |
|                    |       | 0.427 |                  |          |                       |
|                    |       | 0.356 |                  |          |                       |

The activity of  $\alpha$ -galactosidase without incubation with metal ions was set as 100%, it was 0.34767.

**Table S4.** Effects of Al<sup>3+</sup> ions on activity of *Tricholoma matsutake*  $\alpha$ -galactosidase.

| Concentration (mM) | CK    | OD405 | Average of OD405 | OD405-CK | Relative Activity (%) |
|--------------------|-------|-------|------------------|----------|-----------------------|
| 10                 | 0.076 | 0.332 | 0.320667         | 0.250667 | 72.1 ± 0.01           |
|                    |       | 0.327 |                  |          |                       |
|                    |       | 0.321 |                  |          |                       |
| 5                  | 0.086 | 0.340 | 0.280667         | 0.280667 | 80.7 ± 0.03           |
|                    |       | 0.398 |                  |          |                       |
|                    |       | 0.362 |                  |          |                       |
| 2.5                | 0.072 | 0.267 | 0.254            | 0.254    | 73.1 ± 0.05           |
|                    |       | 0.354 |                  |          |                       |
|                    |       | 0.357 |                  |          |                       |
| 1.25               | 0.074 | 0.380 | 0.286667         | 0.286667 | 82.5 ± 0.02           |
|                    |       | 0.334 |                  |          |                       |
|                    |       | 0.368 |                  |          |                       |

The activity of  $\alpha$ -galactosidase without incubation with metal ions was set as 100%, it was 0.34767.

**Table S5.** Effects of Cu<sup>2+</sup> ions on activity of *Tricholoma matsutake*  $\alpha$ -galactosidase.

| Concentration (mM) | CK    | OD405 | Average of OD405 | OD405-CK | Relative Activity (%) |
|--------------------|-------|-------|------------------|----------|-----------------------|
| 10                 | 0.515 | 0.147 | 0.141333         | -0.37367 | ND                    |
|                    |       | 0.139 |                  |          |                       |
|                    |       | 0.138 |                  |          |                       |
| 5                  | 0.267 | 0.149 | 0.142            | -0.125   | ND                    |
|                    |       | 0.138 |                  |          |                       |
|                    |       | 0.139 |                  |          |                       |
| 2.5                | 0.123 | 0.270 | 0.233667         | 0.110667 | 31.8 ± 0.01           |
|                    |       | 0.146 |                  |          |                       |
|                    |       | 0.258 |                  |          |                       |
| 1.25               | 0.118 | 0.390 | 0.399333         | 0.281333 | 80.9 ± 0.05           |
|                    |       | 0.373 |                  |          |                       |
|                    |       | 0.435 |                  |          |                       |

The activity of  $\alpha$ -galactosidase without incubation with metal ions was set as 100%, it was 0.34767.

**Table S6.** Effects of Fe<sup>3+</sup> ions on activity of *Tricholoma matsutake*  $\alpha$ -galactosidase.

| Concentration (mM) | CK    | OD405 | Average of OD405 | OD405-CK | Relative Activity (%) |
|--------------------|-------|-------|------------------|----------|-----------------------|
| 10                 | 1.198 | 0.787 | 0.796333         | -0.40167 | ND                    |
|                    |       | 0.807 |                  |          |                       |
|                    |       | 0.795 |                  |          |                       |
| 5                  | 0.678 | 0.452 | 0.401333         | -0.27667 | ND                    |
|                    |       | 0.341 |                  |          |                       |
|                    |       | 0.411 |                  |          |                       |
| 2.5                | 0.370 | 0.350 | 0.320667         | -0.04933 | ND                    |
|                    |       | 0.288 |                  |          |                       |
|                    |       | 0.324 |                  |          |                       |
| 1.25               | 0.224 | 0.345 | 0.333333         | 0.190333 | 31.4 ± 0.02           |
|                    |       | 0.348 |                  |          |                       |
|                    |       | 0.307 |                  |          |                       |

The activity of  $\alpha$ -galactosidase without incubation with metal ions was set as 100%, it was 0.34767.
